# Supplementary material
Source: publisher site journal article supplement (https://cdn.jamanetwork.com/ama/content_public/journal/jama/929772/joi140005supp1_prod.pdf)
Supplement: Supplementary file 1 [file joi140005supp1_prod.pdf]

## Supplementary Online Content

Porsteinsson AP, Drye LT, Pollock BG, et al. Effect of citalopram on agitation in Alzheimer disease: the CitAD randomized controlled trial. *JAMA*.  
doi:10.1001/jama.2014.93

**eAppendix .** Clinic by Treatment  
**eTable.** Serious Adverse Events

This supplementary material has been provided by the authors to give readers additional information about their work.

## **eAppendix.** Clinic by Treatment

Controlling for clinic (as either a fixed effect or random effect) made very little difference in the citalopram effect estimates. To see if the treatment effects differed by clinic, we tested for a treatment by clinic by linear time interaction using the longitudinal mixed model and it was not significant ( $p = 0.42$ ); however, that test is poorly powered. So we also looked at the estimate of the citalopram minus placebo difference at week 9 at all clinics using the mixed effects means model to look for qualitative differences in the effect estimate. The smallest estimated difference at week 9 by clinic was -0.8 and the largest was -1.2 (compared to the overall difference of -0.9) so we believe that the treatment effects were similar across clinics and the estimates were not driven by clinic interactions

## eTable. Serious Adverse Events

|                                     | Total | Citalopram | Placebo |  |
|-------------------------------------|-------|------------|---------|--|
| Total serious adverse events (SAEs) | 15    | 8          | 7       |  |

### Serious adverse events for citalopram (8 SAEs)

| SR # | Event                                            | Weeks since rz | Age | Gender | Outcome                                                                                  |
|------|--------------------------------------------------|----------------|-----|--------|------------------------------------------------------------------------------------------|
| 1    | Change in mental status                          | 1              | 85  | M      | Hospitalized; patient continued study treatment                                          |
| 2    | Cellulitis                                       | 1              | 71  | F      | Hospitalized treated with antibiotics                                                    |
|      | SR #2 update: Sepsis                             | --             | 71  | F      | Hospitalized; patient found to be hyponatremic which normalized; discontinued study drug |
| 4    | Adverse reaction to IV contrast                  | 8              | 77  | M      | Hospitalized; patient discontinued study drug                                            |
|      | SR #4 update: Pneumonia                          | --             | 77  | M      | Patient diagnosed with pneumonia and treated with antibiotics; discharged from hospital  |
| 5    | Surgical removal of infected plate in left wrist | 5              | 82  | F      | Hospitalized; patient continued study treatment                                          |
| 6    | Increased agitation                              | 2              | 74  | M      | Hospitalized; patient continued study treatment                                          |

**eTable. Serious Adverse Events**

| SR # | Event                   | Weeks since rz | Age | Gender | Outcome                                                                                                                                   |
|------|-------------------------|----------------|-----|--------|-------------------------------------------------------------------------------------------------------------------------------------------|
| 7    | Fall                    | 4              | 80  | F      | Hospitalized; became more agitated and was treated with haldol and cogentin; study drug compliance unclear                                |
|      | SR #7 update: Syncope   | --             | 80  | F      | Hospitalized                                                                                                                              |
| 8    | Syncope/<br>Hypotension | 2              | 78  | F      | Hospitalized; study medication dose reduced                                                                                               |
| 12   | Chest pain              | 8              | 72  | F      | Hospitalized; study drug stopped and restarted; evaluated for myocardial infarction; Possible Gastroesophageal reflux disease; discharged |

**Serious adverse events for placebo (7 SAEs, including 1 death)**

| SR# | Event                   | Weeks since rz | Age | Gender | Outcome                                                                                                |
|-----|-------------------------|----------------|-----|--------|--------------------------------------------------------------------------------------------------------|
| 3   | Cancer-lung             | 1              | 75  | M      | Cancer metastasized throughout body; hospice notified                                                  |
|     | SR #3 update: death     | --             | 75  | M      | Death                                                                                                  |
| 9   | Change in mental status | 8              | 81  | F      | Hospitalized; medical work-up negative; diagnosis given "end stage AD"; placement in long-term hospice |

**eTable. Serious Adverse Events**

|    |                                                             |    |    |   |                                                                                                                         |
|----|-------------------------------------------------------------|----|----|---|-------------------------------------------------------------------------------------------------------------------------|
| 10 | Abdominal pain                                              | 8  | 84 | M | Hospitalized; undergoing evaluation                                                                                     |
|    | SR#10 update: Acute back pain                               | -- | 84 | M | Study treatment terminated; medical work-up negative; discharged on Seroquel and Tylenol                                |
| 11 | Skin rash and itching; increased behavioral lack of control | 3  | 81 | M | Hospitalized; stopped study medication; found to have UTI; received antibiotics and sertraline and seroquel; discharged |
| 13 | Increased agitation                                         | <1 | 82 | M | Hospitalized, study drug continued; lorazepam also used as needed                                                       |
| 14 | Altered mental status                                       | 3  | 76 | F | Hospitalized; study drug terminated; seroquel administered; stabilized; discharged to nursing home                      |
| 15 | Broken hip                                                  | 2  | 86 | F | Fell at home; required surgery; hospitalized; study drug terminated                                                     |

## eTable. Serious Adverse Events

### Scales used in CitAD:

#### Activities of Daily Living (ADCS-ADL)

- **ADL** – ADCS-ADL score (range 0-78 where higher scores indicate less functional impairment).

#### Clinical Global Impression of Change (ADCS-CGIC)

- **CGIC\_Overall** – overall clinical score (range 1-7 where 1 indicates marked improvement and 7 indicates marked worsening from baseline).
- **CGIC\_Agitation** – agitation subscore (range 1-7 where 1 indicates marked improvement and 7 indicates marked worsening from baseline).

#### Cohen-Mansfield Agitation Inventory Scale (CMAI)

- **CMAI** – overall score (range 14-70 where higher scores indicate more severe symptoms).

#### Get Up and Go (GUG)

- **GUG\_performance** – performance rated on the basis of fall risk during test (range 1-5 where 1 is normal and 5 is severely abnormal).
- **GUG\_record** – the ability to walk for the GUG test (1 = Yes, 0 = No).
- **GUG\_time** – time to complete the GUG test (in seconds).

#### Mini-Mental State Examination (MMSE)

- **MMSE** – overall score (range 0-30 where higher scores indicate better functioning).

#### Neurobehavioral Rating scale (NBRS)

- **NBRS** – overall score (range 0-168 where higher scores indicate more severe symptoms).
- **NBRS-Agitation** – agitation subscore (range 0-18 where higher scores indicate more severe symptoms).

#### Neuropsychiatric Inventory (NPI)

- **TotalNPI** – overall score (range 0-144 where higher scores indicate more severe symptoms).
- **NPI\_AberrantMotor** – aberrant motor behavior subscale score (range 0-12 where higher scores indicate more severe symptoms).

## eTable. Serious Adverse Events

- **NPI\_Agitation** – agitation/aggression subscale score (range 0-12 where higher scores indicate more severe symptoms).
- **NPI\_Anxiety** – anxiety subscale score (range 0-12 where higher scores indicate more severe symptoms).
- **NPI\_Apathy** – apathy/indifference subscale score (range 0-12 where higher scores indicate more severe symptoms).
- **NPI\_Appetite** – appetite and eating disorders subscale score (range 0-12 where higher scores indicate more severe symptoms).
- **NPI\_Delusion** – delusions subscale score (range 0-12 where higher scores indicate more severe symptoms).
- **NPI\_Depression** – depression/dysphoria subscale score (range 0-12 where higher scores indicate more severe symptoms).
- **NPI\_Disinhibition** – disinhibition subscale score (range 0-12 where higher scores indicate more severe symptoms).
- **NPI\_Elation** – elation/euphoria subscale score (range 0-12 where higher scores indicate more severe symptoms).
- **NPI\_Hallucination** – hallucinations subscale score (range 0-12 where higher scores indicate more severe symptoms).
- **NPI\_Irritability** – irritability/liability subscale score (range 0-12 where higher scores indicate more severe symptoms).
- **NPI\_NonMood** – non-mood domain score (range 0-12 where higher scores indicate more severe symptoms).
- **NPI\_Sleep** – sleep and nighttime behavior disorders subscale score (range 0-12 where higher scores indicate more severe symptoms).

### Caregiver Distress

- **Distress** – NPI caregiver distress score (range 0-60 where higher scores indicate greater caregiver distress).
